# Different contrast encoding in ON and OFF visual pathways

Saad Idrees<sup>1,2</sup> and Thomas A. Münch<sup>1,3\*</sup>

<sup>1</sup>Werner Reichardt Centre for Integrative Neuroscience, University of Tübingen, 72076 Tübingen, Germany

<sup>2</sup>International Max Planck Research School, Graduate Training Centre of Neuroscience, University of Tübingen, 72074 Tübingen, Germany

<sup>3</sup>Institute for Ophthalmic Research, University of Tübingen, 72076 Tübingen, Germany

\*Correspondence: [thomas.muench@gmail.com](mailto:thomas.muench@gmail.com)

## 14 **Abstract**

15 Subjective visual experience builds on sensory encoding of light reflected by different  
16 objects in our environment. Most retinal ganglion cells encode changes in light intensity,  
17 quantified as contrast, rather than the absolute intensity. Mathematically, contrast is often  
18 defined as a relative change in light intensity. Activity in the visual system and perceptual  
19 responses are usually explained with such definitions of contrast. Here, for the first time,  
20 we explicitly explored how contrast is actually represented in the visual system. Using  
21 mouse retina electrophysiology, we show that response strength of OFF retinal ganglion  
22 cells does not represent relative, but absolute changes in light intensity. ON RGC  
23 response strength is governed by a combination of absolute and relative change in light  
24 intensity. This is true for a wide range of ambient light levels, at least from scotopic to high  
25 mesopic regimes. Consequently, light decrements and increments are represented  
26 asymmetrically in the retina, which may explain the asymmetries in responses to negative  
27 and positive contrast observed throughout the visual system. These findings may help to  
28 more thoroughly design and interpret vision science studies where responses are driven  
29 by contrast of the visual stimuli.

## 30 Introduction

31 The activity of retinal ganglion cells (RGCs) does not encode the absolute light intensity,  
32 with the notable exception of intrinsically photosensitive retinal ganglion cells (ipRGCs),  
33 also known as melanopsin-containing ganglion cells (Do et al., 2009). Instead, ganglion  
34 cells encode the *change* in light intensity. The magnitude of this change is called contrast.  
35 In this study, we asked two questions: according to which rules do retinal ganglion cells  
36 encode contrast? And is this interpretation of contrast different at different light intensity  
37 regimes, such as for night-time vision and day-time vision?

38 Mathematically, contrast can be quantified in different ways, which we will exemplify with  
39 a real-world scenario. Imagine the sun breaking through the clouds; the world becomes  
40 brighter by a certain amount. How big, quantitatively, is this intensity increase? Let us  
41 consider different objects in the scene that we are looking at, for example a relatively  
42 bright flower (F) and a relatively dark leaf (L, compare inset in Fig. 3). “Bright” and “dark”  
43 here mean that these objects reflect different amounts of the incident light. Thus, while  
44 the sun has still been behind the clouds, those objects had different starting intensities  
45 ( $F_{Cloud}$  and  $L_{Cloud}$ ), and after the “event” they have different end intensities ( $F_{Sun}$  and  $L_{Sun}$ ).  
46 We can assume that the reflectance of the flower and leaf are fixed physical properties  
47 and do not change (Land and McCann, 1971; Shapley and Enroth-Cugell, 1984), so that  
48 the intensity changes by a constant and identical factor  $k > 1$  when the sun breaks  
49 through the clouds, namely  $Intensity_{after} = k \cdot Intensity_{before}$ . We then get  $F_{Sun} =$   
50  $k \cdot F_{Cloud}$  and  $L_{Sun} = k \cdot L_{Cloud}$ , or  $k = \frac{L_{Sun}}{L_{Cloud}} = \frac{F_{Sun}}{F_{Cloud}}$ . This ratio is one way of expressing  
51 how much the intensities of objects have changed:

$$Ratio\ contrast = \frac{Intensity_{after}}{Intensity_{before}} = k \quad (\text{Equation 1})$$

52 Weber and Michelson contrasts are other ways to express the change in intensity. If,  
53 again, we assume that  $Intensity_{after} = k Intensity_{before}$ , we get

$$\text{Weber contrast} = \frac{\text{Intensity}_{\text{after}} - \text{Intensity}_{\text{before}}}{\text{Intensity}_{\text{before}}} = k - 1 \quad (\text{Equation 2})$$

54

$$\text{Michelson contrast} = \frac{\text{Intensity}_{\text{after}} - \text{Intensity}_{\text{before}}}{\text{Intensity}_{\text{after}} + \text{Intensity}_{\text{before}}} = \frac{k - 1}{k + 1} \quad (\text{Equation 3})$$

55 Numerically, Ratio contrast, Weber contrast, and Michelson contrast give different values,  
56 but they have in common that the contrast value only depends only on  $k$  and is  
57 independent of the absolute intensity of objects in the world. In other words: the value is  
58 the same for the flower as for the leaf. As such, these three different measures of contrast  
59 express relative changes in light intensity that do not depend on the initial intensity.

60 One could also quantify the change in light intensity differently, for example by how much  
61 (in absolute terms) an object's intensity has increased. Under the same assumption as  
62 before, namely  $\text{Intensity}_{\text{after}} = k \cdot \text{Intensity}_{\text{before}}$ , we get

$$\begin{aligned} \text{Difference contrast} &= \text{Intensity}_{\text{after}} - \text{Intensity}_{\text{before}} && (\text{Equation 4}) \\ &= (k - 1) \text{Intensity}_{\text{before}} \end{aligned}$$

63 In this metric, the brightness change of each object is not independent of its initial  
64 intensity, but it changes by the factor of  $k - 1$  of its initial brightness. Here, the bright  
65 flower and the dim leaf produce a different contrast when the sun breaks through the  
66 clouds. Thus, "Difference contrast" provides a fundamentally different interpretation of the  
67 event as Ratio contrast, Weber contrast, or Michelson contrast.

68 Figure 1a and b depict the different scenarios described above. In both plots, the x-axis  
69 represents the initial intensities of objects, the y-axis the intensities after light change. Any  
70 point in this coordinate system therefore corresponds to an  $\text{Intensity}_{\text{before}} \rightarrow \text{Intensity}_{\text{after}}$   
71 event that has a certain contrast. If two points fall on the same line in Fig. 1a, then they  
72 have the same contrast according to the interpretation provided by Ratio contrast (and  
73 also by Weber or Michelson contrast): gray lines represent increases in light intensity ( $k >$   
74 1, which is equivalent to  $(k - 1) > 0$ , or  $0 < \frac{k-1}{k+1} < 1$ ), and different gray lines represent

75 events where light intensity increases by different amounts. Black lines, correspondingly,  
76 show various iso-contrast conditions for decreases in light intensity ( $0 < k < 1$ ). In Fig.  
77 1b, the lines indicate iso-contrast events according to the interpretation provided by  
78 Difference contrast. Note that the iso-contrast lines in Fig. 1a are increasingly steep, while  
79 they are parallel to each other in Fig. 1b.

80 How is contrast represented in the responses of retinal ganglion cells (RGCs)? Our  
81 hypothesis was that RGCs would encode relative changes in light intensity, i.e. their  
82 response strength would be proportional to the Ratio, Weber, or Michelson contrast  
83 experienced by them. If true, an ON RGC would then treat the intensity change of the  
84 flower ( $F_{Cloud} \rightarrow F_{Sun}$ ) and the leaf ( $L_{Cloud} \rightarrow L_{Sun}$ ) as equivalent and would respond with  
85 comparable strength to those two events. Correspondingly, an OFF RGC would respond  
86 to the opposite event, when the sun hides behind clouds, in the same way, irrespective  
87 of the object that it is exposed to (flower or leaf). Independent of the validity of our  
88 hypothesis, it is clear that an RGC may respond with the same strength to different  
89 stimulus events, i.e. different combinations of before/after intensities. Our approach has  
90 been to record the responses of RGCs to many such before/after combinations, and draw  
91 “iso-response lines” for RGCs similar to the “iso-contrast lines” in Fig. 1. If our hypothesis  
92 is true, namely that RGCs faithfully encode light changes as the ratio of before/after light  
93 intensities, then we would expect that these iso-response lines follow the same trend as  
94 the iso-contrast lines of Fig. 1a. Otherwise, in contradiction to our hypothesis, we may  
95 observe other scenarios, such as iso-response lines that are parallel to each other (Fig.  
96 1b, representing the scenario that the “Difference Contrast” is the relevant metric for  
97 RGCs, i.e. they would encode absolute change, rather than relative change of light  
98 intensity), or that the iso-response lines become increasingly less-steep (representing a  
99 scenario with response suppression, for example when responses start to become  
100 saturated). However, in our experiments, we tried to avoid this last scenario by restricting  
101 stimuli to moderate contrasts. We found that the behavior of ON RGCs was consistent  
102 with our hypothesis, they appear to encode relative changes in light intensity. OFF RGC  
103 behavior, on the other hand, was inconsistent with the hypothesis, and they seem to  
104 encode absolute changes of light intensities.

## 105 Results

106 To test the hypothesis that responses of RGCs solely depend on the relative change in  
107 light intensity irrespective of the starting intensity, we recorded the spiking activity of  
108 RGCs in isolated ex vivo mouse retinæ (n=3) using high-density multi-electrode arrays  
109 (Müller et al., 2015) (MEAs), while we exposed them to several different step stimuli. Each  
110 step stimulus consisted of a uniform background, of one of 16 possible intensities, that  
111 was presented for 4 seconds. We refer to this intensity as *Intensity<sub>before</sub>*. Then, the  
112 intensity was increased or decreased instantaneously (“ON step” or “OFF step”) and  
113 stayed at the new value (*Intensity<sub>after</sub>*) for 1 s. In total, there were 368 ON steps  
114 (combinations of before and after intensities), and 256 OFF steps, repeated several times.  
115 Most RGCs responded robustly to these steps. We quantified the response strength as  
116 the peak of the RGC’s spike rate within 400 ms after the step. Different *Intensity<sub>before</sub>* →  
117 *Intensity<sub>after</sub>* steps resulted in different response strengths. To quantify the response at  
118 the population level, we first normalized the responses of each recorded RGC relative to  
119 its median response strength to all *Intensity<sub>before</sub>* → *Intensity<sub>after</sub>* combinations (analyzing  
120 ON steps for the n=177 ON RGCs; analyzing OFF steps for the n=66 OFF RGCs. We  
121 normalized each cell by its median response strength, rather than by the maximal  
122 response, so that potential saturation of responses for stronger stimuli, or any outlier  
123 responses, would not influence the overall shape of the stimulus-response relationship.)  
124 We then generated a generic ON RGC by taking the median response strengths to each  
125 before/after combination across all ON cells. Finally, we normalized the resulting  
126 responses (Fig. 2a, black dots). We fitted a second-order polynomial to these responses  
127 to estimate the response strength of the generic RGC to a continuous range of  
128 *Intensity<sub>before</sub>* → *Intensity<sub>after</sub>* combinations (Fig. 2a, surface fit). Similarly, we generated a  
129 generic OFF RGC (Fig. 2a).

130 Different *Intensity<sub>before</sub>* → *Intensity<sub>after</sub>* steps that induced the same response strength can  
131 be found along iso-elevation lines of the surface, indicated by the same surface coloring,  
132 and highlighted by the black elevation lines in Fig. 2a. For example, even though the

133 stimulus steps marked 1 and 2 in Fig. 2a have different  $Intensity_{before}$  and  $Intensity_{after}$   
134 values, they elicit very similar responses (Fig. 2c). Correspondingly, stimulus steps  
135 marked 3,4 of the generic ON RGC, and steps 5,6 and 7,8 of the generic OFF RGC elicit  
136 very similar responses (Fig. 2c). Fig. 2b shows these surface iso-elevation lines in a 2-  
137 dimensional view, similar to the format of Fig. 1. For low to medium intensity stimuli, these  
138 iso-response lines can be captured well with a linear regression model of the form

$$Intensity_{after} = m_r \cdot Intensity_{before} + n_r \quad (\text{Equation 5})$$

139 An example for such a linear fit is shown in Fig. 2b as a dashed black line. Figs. 2d and  
140 2e show the parameters  $m_r$  and  $n_r$  of the linear regression as a function of response  
141 strength,  $r$ . For high-intensity stimuli the iso-elevation lines curve strongly (Fig. 2b); this  
142 corresponds to the surfaces in Fig. 2a flattening, meaning that the RGC responses start  
143 to saturate. For those high-intensity stimuli, a linear approximation of the iso-response  
144 lines according to (Equation 5 is not very meaningful. In Figs. 2d and 2e this becomes  
145 apparent for response strengths beyond 0.7. We will therefore limit our interpretation of  
146 the results to the range below 0.7, i.e. to the range of low to medium intensity stimuli.

147 We have performed the measurements and analysis described above at three light levels:  
148 scotopic, medium mesopic, and high mesopic. Fig. 2a-c shows the data for the medium  
149 mesopic light level, Fig. 2d-e show the parameters  $m_r$  and  $n_r$  for all three light levels.

150 At all light levels, we found that ON and OFF RGCs interpret “contrast” in different ways.  
151 For the generic OFF RGC, the multiplicative factor  $m_r$  hardly varied with response  
152 strength  $r$  (Fig. 2d). This corresponds to the iso-response lines in Fig. 2b being parallel  
153 to each other (their slope,  $m_r$ , does not change). With increasing response strength, these  
154 parallel lines move further down, represented by the ever-increasing negative values of  
155 the parameter  $n_r$  (Fig. 2e). Note that this is the same situation as depicted in Fig. 1b,  
156 indicating that OFF RGC responses are almost exclusively driven by *absolute* changes  
157 in light intensities ( $Intensity_{after} - Intensity_{before}$ ). In ON RGCs, on the other hand, the  
158 multiplicative factor  $m_r$  rises continuously with response strength  $r$ , i.e. the iso-response

159 lines in Fig. 2b have increasing slopes. This is similar to the situation depicted in Fig. 1a,  
160 indicating that ON RGCs are driven by relative changes in light intensity.

161 What are the implications of this OFF RGC behavior? We return to our example from the  
162 introduction. When the sun hides behind clouds, the world becomes darker, and objects  
163 (for example the flower and the leaf) all reflect less light by a factor of  $k$  ( $0 < k < 1$ ). This  
164 real-world change of object intensities is represented in Fig. 3 by the two circles that are  
165 located on the black line with slope  $k$ . The gray dashed lines represent other scenarios,  
166 for example when the sun would be obscured by a lighter cloud leading to less darkening,  
167 or by a thicker cloud leading to more darkening. In the given situation, corresponding OFF  
168 RGCs exposed to the flower and the leaf will not respond equally to the event, because  
169 OFF RGCs follow the rules of difference-contrast. This is represented by the parallel red  
170 lines in Fig. 3: the flower and the leaf fall on different red lines; the brighter flower is  
171 located on an iso-response line corresponding to stronger responses than the iso-  
172 response line containing the leaf (compare Fig. 2a, the surface rises towards the bottom  
173 right). Correspondingly, the flower-OFF-RGC would respond more strongly to the event  
174 than the leaf-OFF-RGC because the absolute decrement is stronger, even though the  
175 illumination intensity for the two OFF RGCs decreases by the same factor. In general,  
176 when the world is dimming by a constant factor, OFF RGC responses to the dimming of  
177 brighter objects in the scene (flower) are stronger than responses to the corresponding  
178 dimming of darker objects (leaf).

179 When we inspect the behavior of ON RGCs more closely, we can observe that the  
180 additive parameter  $n_r$  (Fig. 2e) is also not constant. Rather,  $n_r$  appears to follow mirror-  
181 symmetric trends for ON and OFF RGCs. If ON RGCs would have behavior that purely  
182 adheres to Ratio contrast, the parameter  $n_r$  should have a constant value of 0 (note that  
183 the hypothetical iso-contrast lines in Fig. 1a, as the dashed gray lines in Fig. 3, all intersect  
184 at the origin of the coordinate system: their intercept  $n_r$  is always 0). This is clearly not  
185 the case for ON RGCs. So, like for OFF RGCs, ON RGC responses are enhanced for  
186 objects experiencing stronger absolute changes, i.e. darker objects in the scene. This  
187 mirrors OFF RGC behavior. However, given the fact that a component of ON RGC



188 behavior is driven by Ratio contrast, this enhancement is not as pronounced as for OFF  
189 RGCs.

190 Taken together, at all three light intensities tested, a component of what drives RGC  
191 responses is the absolute change in light intensities, and this component of RGC behavior  
192 can be described by Difference contrast. In scenarios where the luminance of all objects  
193 changes by a constant factor, this emphasizes the responses of OFF RGCs to brighter  
194 objects, and of ON RGCs to darker objects. For OFF RGCs, this absolute brightness  
195 change appears to be the main, if not only, factor that determines their response strength.  
196 ON RGC responses are additionally driven by relative changes of brightness (according  
197 to Ratio, Weber, or Michelson contrast). Taken by itself, this would mean that ON RGCs  
198 would respond to all objects in a heterogeneous scene equally when the illumination of  
199 that scene increases by a constant factor. When combined with the behavior according  
200 to Difference contrast, this means that responses of different ON RGCs are more  
201 equalized than those of OFF RGCs.

## 202 **Discussion**

203 Our results describe a novel asymmetry in ON and OFF RGCs with respect to what  
204 contrast means for them. For moderate changes in intensities, the peak spiking rate of  
205 OFF RGC responses represents absolute changes in intensities, in a manner consistent  
206 with Difference contrast. When we consider a scenario where the illumination of a scene  
207 changes by a constant factor, OFF RGC responses emphasize bright objects in a scene.  
208 ON RGCs, on the other hand, encode mostly relative changes in light intensity, in a  
209 manner consistent with the definition of Ratio, Weber, and Michelson contrast. While this  
210 would lead to equal responses to all object in a scene, responses of ON RGCs are also  
211 partially driven by absolute changes in light intensity, so that ON RGCs somewhat  
212 emphasize their responses to the brightening of dark objects.

213 ON and OFF RGCs are driven not only by global changes in illumination, but by any  
214 brightness change within their receptive fields. Arguably the most common scenario  
215 underlying such local brightness changes would be self-movement of the observer (eye  
216 and body movement) which leads to translational shifts of the projected world on the

217 retina. These local changes in brightness are less coherent or predictable on the global  
218 scale as described for our original scenario. Still, the response rules we have discovered  
219 (how contrast is encoded differently by ON and OFF RGCs) are very fundamental and  
220 likely govern retinal activity also under these other scenarios.

221 The asymmetric representation of contrast in ON and OFF RGCs might be conserved  
222 along the visual hierarchy, contributing at least in part to the perceptual asymmetries in  
223 detecting light increments and decrements. For example, to generate equal  
224 psychophysical responses, light increments and decrements must be different in  
225 magnitude (Lu and Sperling, 2012), with decrements having a lower detectability  
226 threshold (Bowen et al., 1989; Lu and Sperling, 2012; Whittle, 1986).

227 What mechanisms in the retina may lead to the asymmetry in contrast representation  
228 across ON and OFF RGCs? Cone responses in various vertebrates have been shown to  
229 follow Weber's law for moderate intensity changes (Burkhardt, 1994; Clark et al., 2013;  
230 Normann and Werblin, 1974; Shapley and Enroth-Cugell, 1984). Those observations  
231 were however mostly based on light increments. It is now well established that cone  
232 responses to light increments and decrements are asymmetric: the depolarization  
233 following a dark flash is larger in amplitude than the hyperpolarization following a bright  
234 flash of same magnitude from the background (defined as absolute difference) (Baden et  
235 al., 2013; Clark et al., 2013; Cooper, 2016). It is therefore likely that the mechanisms  
236 underlying different contrast representations in ON and OFF RGCs start already at the  
237 level of cones. This would mean that the underlying mechanism is independent of  
238 specialized circuitry. In addition, because ON and OFF RGCs show equally different  
239 contrast encoding at scotopic light levels (Fig. 2d, e), this suggests that rod  
240 photoreceptors may have similar asymmetries in responding to positive and negative  
241 intensity changes as cone photoreceptors. This could in principle explain why the contrast  
242 representations remain unaltered at different ambient light levels, even when retinal  
243 circuits can alter their responses considerably (Tikidji-Hamburyan et al., 2015).  
244 Nonetheless, retinal pathways downstream of photoreceptors can also be involved in  
245 modifying the response to different contrast levels (Freed, 2017; Zaghoul et al., 2003).

246 Our finding that ‘contrast’ means different quantities for ON and OFF RGCs has several  
247 implications in vision science. By default, contrast is often considered to be a symmetric  
248 quantity with respect to positive and negative luminance changes, meaning that ON and  
249 OFF RGCs encode equal but opposite luminance changes. Most visual studies build on  
250 this assumption to design contrast-balanced stimuli in order to stimulate the ON and OFF  
251 pathways equally. Even more importantly, stimuli should be designed in a way that all ON  
252 RGCs, irrespective of their spatial location on the retina, are activated equally, and the  
253 same would be expected for OFF RGCs. For example, according to our data, if one  
254 wanted to activate all OFF RGCs equally by a “flash” (dark flash) on top of a non-  
255 homogeneous scene (e.g. a natural image, where the starting intensity is different for  
256 RGCs distributed across the retina), then a constant number should be *subtracted* from  
257 each pixel in the scene. To activate all ON RGCs equally, all pixel-intensities of that scene  
258 should be changed by first *multiplying* by a constant factor (representing the fact that ON  
259 RGCs partially behave according to ratio contrast), and then *adding* a constant value. Our  
260 findings can therefore lead to a more accurate design of visual stimulation paradigms.  
261 Overall, our results describe what contrast means for ON and OFF RGCs which is crucial  
262 in understanding natural vision, given that the retinal sensitivity is governed by the  
263 magnitude and polarity of frequent intensity changes resulting from eye movements such  
264 as saccades (Idrees et al., 2020a, 2020b). Our results also demonstrate a novel  
265 asymmetry between ON and OFF pathways in the retina, which is consistent with the  
266 notion that ON and OFF pathways carry qualitatively different types of information  
267 (Chichilnisky and Kalmar, 2002; Pandarinath et al., 2010).

## 268 **Acknowledgements**

269 This research was supported by Deutsche Forschungsgemeinschaft (DFG) grant  
270 MU3792/1-1 to TAM. TAM also received support from the Tistou and Charlotte Kerstan  
271 Foundation. We thank Jithin Nambiar and Nasser Karmali for assessing the quality of  
272 units sorted by the automated spike sorter and applying the necessary post-hoc steps to  
273 obtain high-quality units. We thank Timm Schubert and Felix Franke for comments on the  
274 manuscript.

275 **Author contributions**

276 TAM conceptualized the study; SI and TAM designed the overall study; SI performed the  
277 retina electrophysiology experiments; SI analyzed the data with supervision from TAM.  
278 SI and TAM interpreted the data and wrote the manuscript.

279 **Declaration of interests**

280 The authors declare no competing interests.

281 **Data availability**

282 All data presented in this paper are stored and archived on secure institute computers  
283 and are available upon reasonable request.

284 **Figures**

285 **Figure 1**

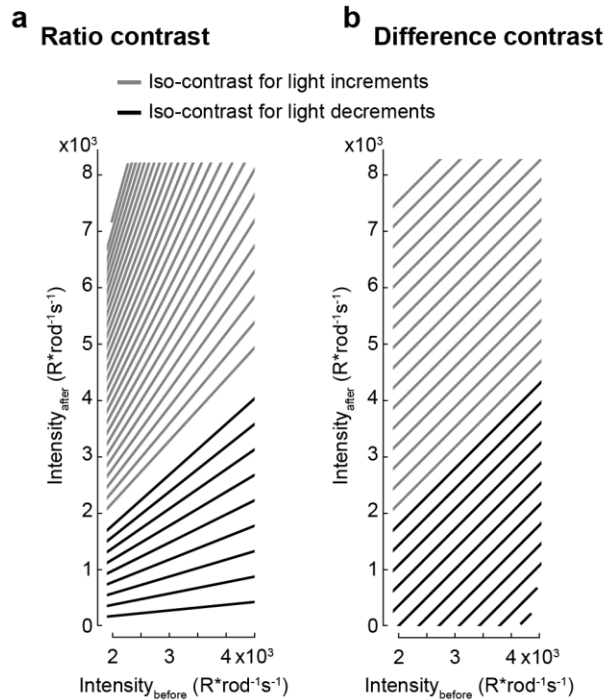

286

287 **Figure 1 Iso-contrast lines for different before/after intensity combinations.**

288 The x- and y-axes represents the intensity (in R\*rod<sup>-1</sup>s<sup>-1</sup>) of objects before and after  
289 experiencing luminance change, respectively. Contrast can be calculated for each

290  $Intensity_{before} \rightarrow Intensity_{after}$  combination, for example in the forms given by

291 Equations 1-4.  $Intensity_{before} \rightarrow Intensity_{after}$  combinations that fall on any one line have

292 the same contrast according to Equations 1-3 (a) or Equation 4 (b). Gray lines: increase

293 in intensity ( $Intensity_{after} > Intensity_{before}$ ). Black lines: decrease in intensity ( $Intensity_{after} <$

294  $Intensity_{before}$ ).

295

296 **Figure 2**

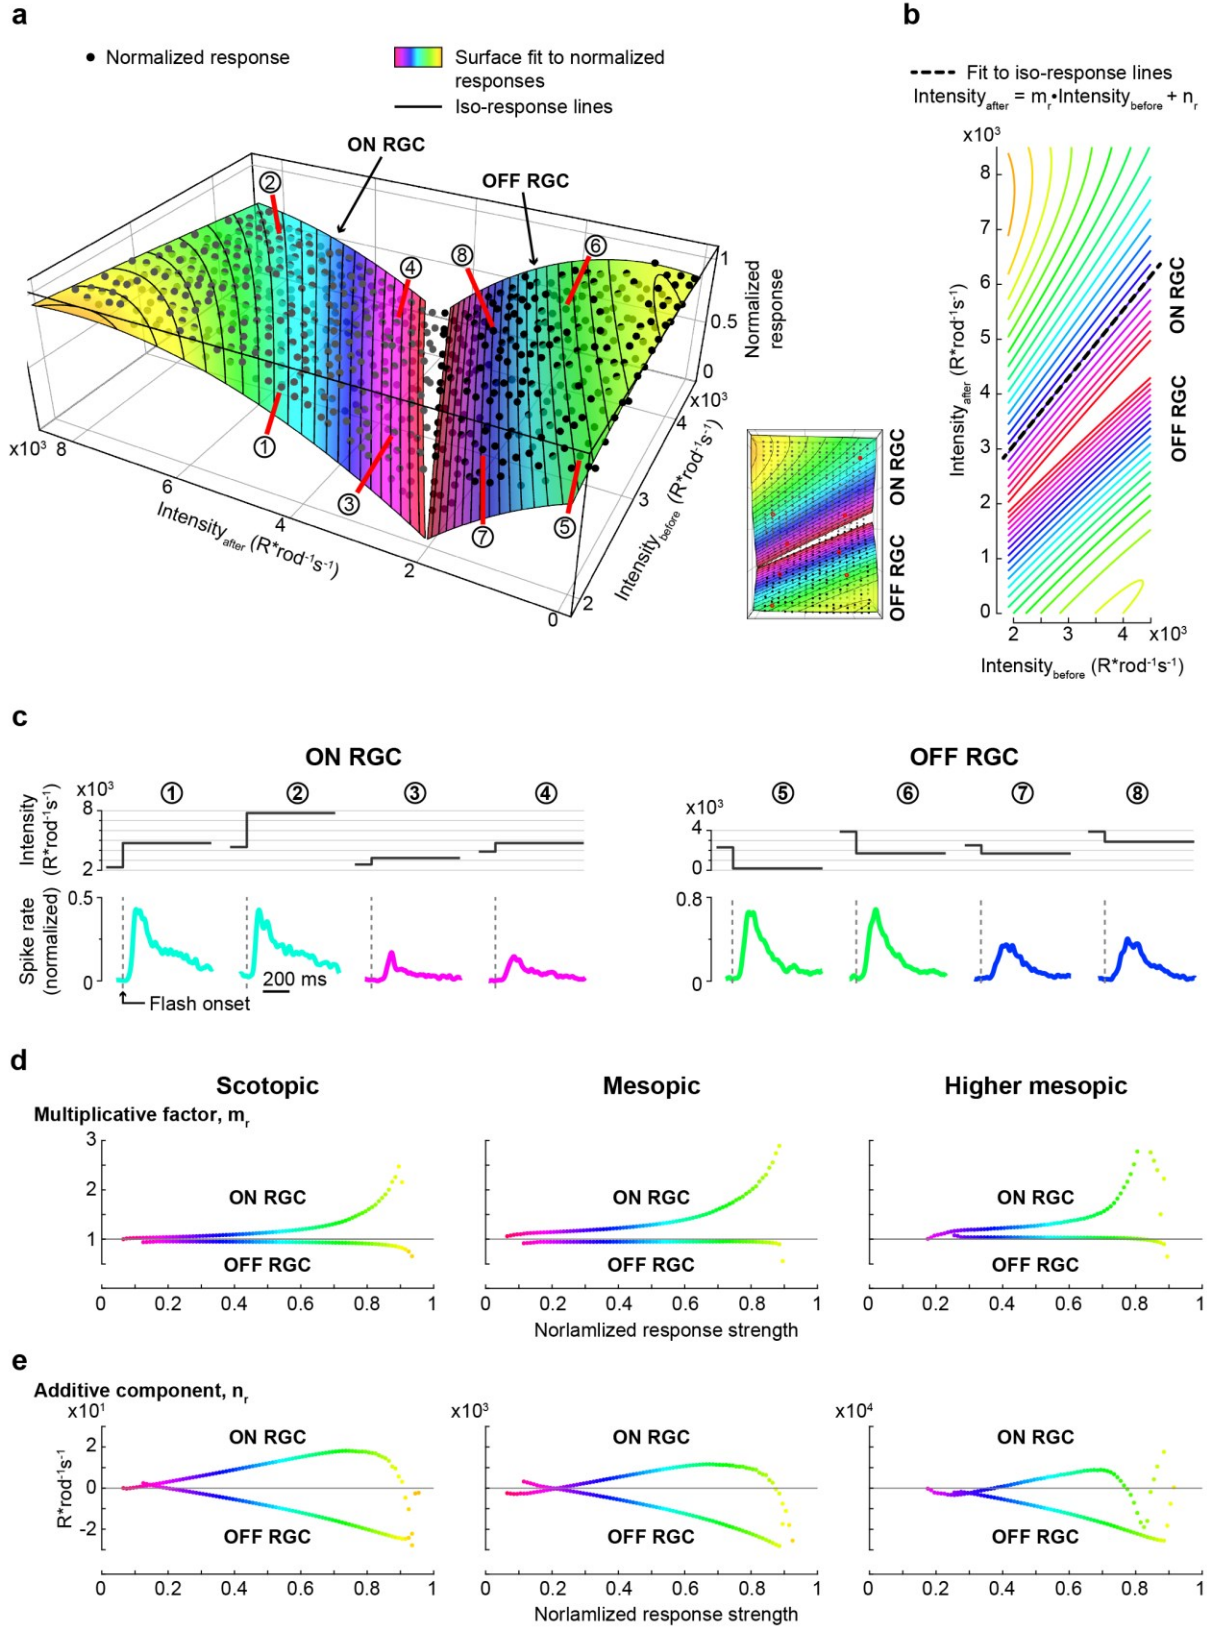

298 **Figure 2 Generic RGC responses to  $Intensity_{before} \rightarrow Intensity_{after}$  steps.**

299 **a. Left:** Normalized responses of generic ON and OFF RGCs as a function of  
300  $Intensity_{before}$  and  $Intensity_{after}$  at mesopic ambient light levels. Intensities are reported in  
301  $R^*rod^{-1}s^{-1}$ . Dots correspond to the  $Intensity_{before} \rightarrow Intensity_{after}$  steps at which data was  
302 recorded ( $N = 368$  steps with  $Intensity_{after} > Intensity_{before}$  that were used to analyze ON  
303 RGCs, and  $N = 256$  steps with  $Intensity_{after} < Intensity_{before}$  for OFF RGC). The two  
304 surfaces were obtained by separately fitting a two-dimensional second-order polynomial  
305 to the ON RGC data and OFF RGC data. Different  $Intensity_{before} \rightarrow Intensity_{after}$  steps that  
306 induced the same response strength can be found along iso-elevation lines of the surface,  
307 indicated by the same surface coloring, and highlighted by the black elevation lines.  
308 Circled numbers point to individual  $Intensity_{before} \rightarrow Intensity_{after}$  steps (1-4 for the generic  
309 ON RGC and 5-8 for the generic OFF RGC), for which the responses are plotted in **c**.  
310 **Right:** top view of the data shown on the left.

311  
312 **b.** Iso-response lines of the surface in **a** in a 2-D view, similar to the format of Fig. 1. Lines  
313 are color-coded to represent the same response strengths as in **a**. Black dashed line is  
314 the linear fit to one of these iso-response lines according to (Equation 5).

315  
316 **c.** Normalized spike rate of the generic ON and OFF RGCs to the different  
317  $Intensity_{before} \rightarrow Intensity_{after}$  steps indicated by circled numbers in **a**. (ON RGC: 1-4; OFF  
318 RGC: 5-8). The stimulus is shown above the response traces. Dashed gray lines mark  
319 the times of intensity change. Response traces are color-coded according the response  
320 strength in **a**; response strength is defined as the peak of the response trace.

321  
322 **d,e.** Values of the multiplicative factor  $m_r$  (**d**) and the additive component  $n_r$  (**e**) as a  
323 function of response strength  $r$ , for the generic ON and generic OFF RGC. These values  
324 were estimated by fitting (Equation 5) to iso-response lines at intervals of 0.01. An  
325 example for such a fit is shown as dashed black line in **b**. Columns correspond to different  
326 ambient luminance levels, Scotopic:  $0.09 R^*rod^{-1}s^{-1}$  to  $82 R^*rod^{-1}s^{-1}$ ; medium mesopic:  $9$   
327  $R^*rod^{-1}s^{-1}$  to  $8169 R^*rod^{-1}s^{-1}$ ; high mesopic:  $91 R^*rod^{-1}s^{-1}$  to  $81,690 R^*rod^{-1}s^{-1}$ . Data in **a-**  
328 **c** shows results at mesopic light conditions.

329 **Figure 3**

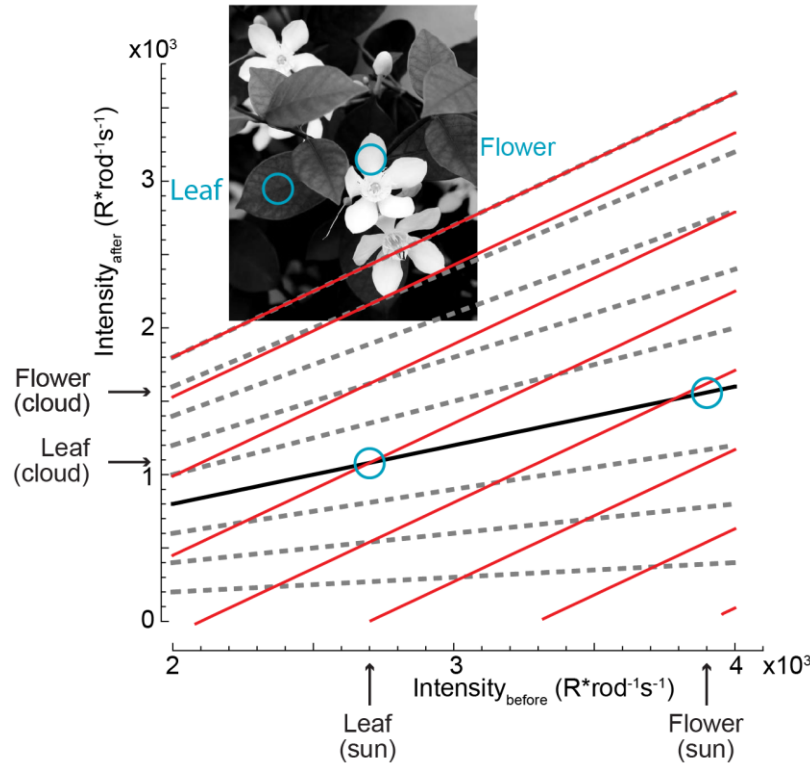

330  
331  
332  
333  
334  
335  
336  
337  
338  
339  
340  
341  
342  
343  
344  
345  
346

**Figure 3 Implications of OFF RGC behavior according to Difference contrast.**

Image of a bright flower and a darker leaf illuminated by a single source (in this case light from the sun). The initial brightness of the hypothetical leaf and the flower in  $R^*rod^{-1}s^{-1}$ ,  $Intensity_{before}$ , is marked by the arrows on x-axis. After a cloud covers the sun, their brightness decreases ( $Intensity_{after}$ , y-axis). Thicker or thinner clouds would trigger a stronger or weaker off-stimulus, represented by the different dashed gray lines. Stronger off-stimulus corresponds to lower lines. Blue circles indicate the before/after intensities of the leaf and the flower for an example cloud that reduces the light falling on all objects by a factor of  $k$  (represented by black line; here  $k \sim 2.5^{-1}$ ). Parallel red lines illustrate OFF RGC iso-responses that follow the difference-contrast. The flower and the leaf fall on different red lines; the brighter flower is located on an iso-response line corresponding to stronger responses.



347

## 348 **Methods**

### 349 **Animals**

350 Mouse ex vivo retina electrophysiology experiments were performed in Tübingen, in  
351 accordance with German and European regulations, and animal experiments were  
352 approved by the Regierungspräsidium Tübingen.

353 We used 3 retinæ from 2 male and 1 female *PV-Cre x Thy-S-Y* mice  
354 (*B6;129P2-Pvalb<sup>tm1(cre)Arbr/J</sup> × C57BL/6-tg (ThystopYFPJS)*), 5-9 months old, which are  
355 functionally wild type (Farrow et al., 2013; Münch et al., 2009; Tikidji-Hamburyan et al.,  
356 2015). We housed mice on a 12/12 h light/dark cycle, in ambient temperatures between  
357 20-22 °C and humidity levels of 40%.

### 358 **Procedure and laboratory setup**

359 Mice were dark adapted for 4-16 h before experiments. We then sacrificed them under  
360 dim red light, removed the eyes, and placed eyecups in Ringer solution (in mM: 110 NaCl,  
361 2.5 KCl, 1 CaCl<sub>2</sub>, 1.6 MgCl<sub>2</sub>, 10 D-glucose, and 22 NaHCO<sub>3</sub>) bubbled with 5% CO<sub>2</sub> and  
362 95% O<sub>2</sub>. We removed the retina from the pigment epithelium and sclera while in Ringer  
363 solution.

364 We recorded retinal ganglion cell (RGC) activity using the MaxOne high-density  
365 multielectrode array (MEA) system (Müller et al., 2015) (Maxwell Biosystems, Basel,  
366 Switzerland). The MaxOne MEA featured 26,400 metal electrodes with center-to-center  
367 spacing of 17.5 µm in a grid-like arrangement over an area of 3.85 x 2.1 mm. Up to 1024  
368 electrodes could be selected for simultaneous recordings. For each experiment, a piece  
369 of isolated retina covering almost the entire electrode array was cut and placed RGC-side  
370 down in the recording chamber. We achieved good electrode contact by applying  
371 pressure on the photoreceptor side of the retina by carefully lowering a transparent  
372 permeable membrane (Corning Transwell polyester membrane, 10 µm thick, 0.4 µm pore  
373 diameter) with the aid of a micromanipulator. The membrane was drilled with 200 µm

374 holes, with center-center distance of 400  $\mu\text{m}$ , in a regular hexagonal arrangement, to  
375 improve access of the Ringer solution to the retina. We superfused the tissue with Ringer  
376 solution at 30-34  $^{\circ}\text{C}$  during recordings, and we recorded extracellular activity at 20 kHz  
377 using FPGA signal processing hardware. Data were acquired using MaxLab software  
378 provided by Maxwell Biosystems, Basel, Switzerland.

379 We presented light stimuli to the retinal piece that was placed on the MEA using a DLP  
380 projector running at 60 Hz (Lightcrafter 4500 from EKB Technologies Ltd.) with internal  
381 red, green and blue light-emitting diodes. The projector had a resolution of 1280 x 800  
382 pixels, extending 3.072 x 1.92 mm on the retinal surface. We focused images onto the  
383 photoreceptors using a 5x objective (illumination from above). The light path contained a  
384 shutter and two motorized filter wheels with a set of neutral density (ND) filters (Thorlabs  
385 NE10B-A to NE50B-A), having optical densities from 1 (ND1) to 5 (ND5). The filters  
386 allowed us to adjust the absolute light level of the stimulation.

387 We measured the spectral intensity profile (in  $\mu\text{W cm}^{-2} \text{nm}^{-1}$ ) of our light stimuli with a  
388 calibrated USB2000+ spectrophotometer (Ocean Optics) and converted the physical  
389 intensity into a biological equivalent of photoisomerizations per rod photoreceptor per  
390 second ( $\text{R}^*\text{rod}^{-1}\text{s}^{-1}$ ), as described before (Tikidji-Hamburyan et al., 2015). Light intensities  
391 of the projector output covered a range of 3 log units (i.e. 1000-fold difference between  
392 black and white pixels, over an 8-bit range). We used the Lightcrafter projector in pattern  
393 sequence mode. In this mode, the projector output is linear. Absolute light intensities at  
394 the mesopic level ranged between 9  $\text{R}^*\text{rod}^{-1}\text{s}^{-1}$  for our darkest stimuli to 8169  $\text{R}^*\text{rod}^{-1}\text{s}^{-1}$   
395 for our brightest stimuli. At the scotopic level, the intensities were 100 times dimmer and  
396 at the higher mesopic level the intensities were 10 times brighter.

### 397 **Visual stimuli**

398 Our visual stimulus consisted of uniform full-field steps. Each step consisted of an  
399  $\text{Intensity}_{\text{before}} \rightarrow \text{Intensity}_{\text{after}}$  step where the display intensity was maintained at the value  
400  $\text{Intensity}_{\text{before}}$  for 4 seconds, followed by an instantaneous change to  $\text{Intensity}_{\text{after}}$ . After 1  
401 second at  $\text{Intensity}_{\text{after}}$ , we switched to the next  $\text{Intensity}_{\text{before}}$  value. A single trial consisted

402 of 39 successive  $Intensity_{before} \rightarrow Intensity_{after}$  steps. The  $Intensity_{before}$  values ranged from  
403 2157 to 4304  $R \cdot rod^{-1} s^{-1}$  at mesopic light level.  $Intensity_{after}$  values ranged from 9 to 8169  
404  $R \cdot rod^{-1} s^{-1}$ . In total there were 368 such steps that induced light increments and 256 steps  
405 that induced light decrements across the retina. These 624  $Intensity_{before} \rightarrow Intensity_{after}$   
406 steps were distributed pseudo-randomly across 16 trials. The 624 dots in Fig. 2 illustrate  
407 all these steps. The batch of 16 trials was repeated at least 4 or 5 times at a single ambient  
408 light regime.

## 409 **Data analysis**

### 410 MEA recordings preprocessing

411 For high-density MEA recordings, we performed spike sorting by an offline automatic  
412 algorithm (Diggelmann et al., 2018). The sorted units were curated with a custom  
413 developed tool, the UnitBrowser (Idrees et al., 2016). We judged the quality of all units  
414 using inter-spike intervals and spike shape variation. Low quality units, such as ones with  
415 high inter-spike intervals, missing spikes, or contamination, were discarded. All spike rate  
416 analyses were based on spike times of individual units. In total, we extracted and  
417 analyzed 243 high quality units after the spike sorting (referred to as RGCs from now on).  
418 We converted spike times to estimates of spike rate by convolving these times with a  
419 Gaussian of  $\sigma = 10$  ms standard deviation and amplitude  $0.25 \sigma^{-1} e^{1/2}$

### 420 Peak responses to $Intensity_{before} \rightarrow Intensity_{after}$ steps

421 For each RGC, we calculated a response to each  $Intensity_{before} \rightarrow Intensity_{after}$  step by  
422 averaging the RGC's spike rate to all repetitions of that step. RGCs that had stronger  
423 responses to light increments were classified as ON RGCs, and RGCs that had stronger  
424 responses to light decrements were classified as OFF RGCs. ON RGCs were then further  
425 analyzed using only steps with  $Intensity_{before} < Intensity_{after}$  (light increments), and OFF  
426 RGCs were further analyzed using only steps with  $Intensity_{before} > Intensity_{after}$  (light  
427 decrements).

428 For all RGCs, we then calculated a peak response to each  $Intensity_{before} \rightarrow Intensity_{after}$   
429 step as the maximum response within 400 ms from the time of step (“response strength”).  
430 We discarded the response to a particular  $Intensity_{before} \rightarrow Intensity_{after}$  step if the peak  
431 response was within noise levels, i.e. within 4 standard deviations of the background  
432 response (1000 ms prior to the step). For each RGC, we then normalized the peak  
433 response to every  $Intensity_{before} \rightarrow Intensity_{after}$  step by the median peak response across  
434 all steps (we did not normalize by the maximal peak so that potential saturation of  
435 responses for stronger stimuli would not influence the overall shape of the stimulus-  
436 response relationship).

437 We then generated a generic ON RGC by taking the median across all ON RGCs for  
438 each before/after combination. Finally, we normalized the resulting responses by the  
439 strongest response (Fig. 2a, black dots). We fitted a second-order polynomial to the  
440 resulting responses in order to obtain responses to a continuous range of  
441  $Intensity_{before} \rightarrow Intensity_{after}$  combinations. Correspondingly, we generated a generic OFF  
442 RGC. The responses of these generic ON and OFF RGCs (Fig. 2a) were used for all  
443 analysis stated in the results section.

444 To obtain the time-varying response traces (Fig. 2c), we repeated the above procedure  
445 on the spike rates and not the peak responses.

446 All data analyses were performed in MATLAB (The MathWorks Inc).

447

448

## 449 **References**

- 450 Baden, T., Schubert, T., Chang, L., Wei, T., Zaichuk, M., Wissinger, B., and Euler, T.  
451 (2013). A tale of two retinal domains: Near-Optimal sampling of achromatic contrasts in  
452 natural scenes through asymmetric photoreceptor distribution. *Neuron* 80, 1206–1217.
- 453 Bowen, R.W., Pokorny, J., and Smith, V.C. (1989). Sawtooth contrast sensitivity:  
454 Decrements have the edge. *Vision Res.* 29.
- 455 Burkhardt, D.A. (1994). Light adaptation and photopigment bleaching in cone  
456 photoreceptors in situ in the retina of the turtle. *J. Neurosci.* 14, 1091–1105.
- 457 Chichilnisky, E.J., and Kalmar, R.S. (2002). Functional asymmetries in ON and OFF  
458 ganglion cells of primate retina. *J. Neurosci.* 22, 2737–2747.
- 459 Clark, D.A., Benichou, R., Meister, M., and Azeredo da Silveira, R. (2013). Dynamical  
460 Adaptation in Photoreceptors. *PLoS Comput. Biol.* 9.
- 461 Cooper, E.A. (2016). A normalized contrast-encoding model exhibits bright/dark  
462 asymmetries similar to early visual neurons. *Physiol. Rep.* 4, 1–10.
- 463 Diggelmann, R., Fiscella, M., Hierlemann, A., and Franke, F. (2018). Automatic spike  
464 sorting for high-density microelectrode arrays. *J. Neurophysiol.* 120, 3155–3171.
- 465 Do, M.T.H., Kang, S.H., Xue, T., Zhong, H., Liao, H.W., Bergles, D.E., and Yau, K.W.  
466 (2009). Photon capture and signalling by melanopsin retinal ganglion cells. *Nature* 457,  
467 281–287.
- 468 Farrow, K., Teixeira, M., Szikra, T., Viney, T.J., Balint, K., Yonehara, K., and Roska, B.  
469 (2013). Ambient illumination toggles a neuronal circuit switch in the retina and visual  
470 perception at cone threshold. *Neuron* 78, 325–338.
- 471 Freed, M.A. (2017). Asymmetry between ON and OFF  $\alpha$  ganglion cells of mouse retina:  
472 integration of signal and noise from synaptic inputs. *J. Physiol.* 595, 6979–6991.
- 473 Idrees, S., Franke, F., Diggelmann, R., Hierlemann, A., and Münch, T.A. (2016).

- 474 UnitBrowser - A tool to evaluate and post-process units sorted by automatic spike  
475 sorting algorithms. *Front. Neurosci.* *10*.
- 476 Idrees, S., Baumann, M.P., Franke, F., Münch, T.A., and Hafed, Z.M. (2020a).  
477 Perceptual saccadic suppression starts in the retina. *Nat. Commun.* *11*, 1977.
- 478 Idrees, S., Baumann, M., Korympidou, M.M., Schubert, T., Kling, A., Franke, K., Hafed,  
479 Z.M., Franke, F., and Münch, T.A. (2020b). Suppression without inhibition : A novel  
480 mechanism in the retina accounts for saccadic suppression. *BioRxiv* 1–71.
- 481 Land, E.H., and McCann, J.J. (1971). Lightness and retinex theory. *J. Opt. Soc. Am.* *61*,  
482 1–11.
- 483 Lu, Z.L., and Sperling, G. (2012). Black-white asymmetry in visual perception. *J. Vis.* *12*,  
484 1–21.
- 485 Müller, J., Ballini, M., Livi, P., Chen, Y., Radivojevic, M., Shadmani, A., Viswam, V.,  
486 Jones, I.L., Fiscella, M., Diggelmann, R., et al. (2015). High-resolution CMOS MEA  
487 platform to study neurons at subcellular, cellular, and network levels. *Lab Chip* *15*,  
488 2767–2780.
- 489 Münch, T.A., da Silveira, R.A., Siegert, S., Viney, T.J., Awatramani, G.B., and Roska, B.  
490 (2009). Approach sensitivity in the retina processed by a multifunctional neural circuit.  
491 *Nat. Neurosci.* *12*, 1308–1316.
- 492 Normann, R.A., and Werblin, F.S. (1974). Control of retinal sensitivity: I. Light and dark  
493 adaptation of vertebrate rods and cones. *J. Gen. Physiol.* *63*, 37–61.
- 494 Pandarinath, C., Victor, J.D., and Nirenberg, S. (2010). Symmetry breakdown in the ON  
495 and OFF pathways of the retina at night: Functional implications. *J. Neurosci.* *30*,  
496 10006–10014.
- 497 Shapley, R., and Enroth-Cugell, C. (1984). Chapter 9 Visual adaptation and retinal gain  
498 controls. *Prog. Retin. Res.* *3*, 263–346.

499 Tikidji-Hamburyan, A., Reinhard, K., Seitter, H., Hovhannisyan, A., Procyk, C.A., Allen,  
500 A.E., Schenk, M., Lucas, R.J., and Münch, T.A. (2015). Retinal output changes  
501 qualitatively with every change in ambient illuminance. *Nat. Neurosci.* *18*, 66–74.

502 Whittle, P. (1986). Increments and decrements: Luminance discrimination. *Vision Res.*  
503 *26*, 1677–1691.

504 Zaghloul, K.A., Boahen, K., and Demb, J.B. (2003). Different circuits for ON and OFF  
505 retinal ganglion cells cause different contrast sensitivities. *J. Neurosci.* *23*, 2645–2654.

506
